# Supplementary material
Source: publisher figshare collection journal article supplement (https://frontiersin.figshare.com/ndownloader/files/15543866)

*Supplementary Material*

**Comparative chloroplast genomics at low taxonomic levels: A case study  
using *Amphilophium* (Bignoniaceae, Bignoniaceae)**

Verônica A. Thode<sup>1\*</sup> and Lúcia G. Lohmann<sup>1\*</sup>

\* **Correspondence:** [veronicathode@hotmail.com](mailto:veronicathode@hotmail.com), [llohmann@usp.br](mailto:llohmann@usp.br)

## SUPPLEMENTARY TABLES

**Supplementary Table 1.** Number of reads and average read depth for the assembled plastomes.

| Species                                                       | Number of reads | Average read depth |
|---------------------------------------------------------------|-----------------|--------------------|
| <i>Amphilophium carolinae</i> (Lindl.) L. G. Lohmann          | 12,688,841      | 85.4               |
| <i>Amphilophium chocoensis</i> (A. H. Gentry) L. G. Lohmann   | 14,885,219      | 100.1              |
| <i>Amphilophium cuneifolium</i> (DC.) L. G. Lohmann           | 8,102,426       | 54.5               |
| <i>Amphilophium dolichoides</i> (Cham.) L. G. Lohmann         | 23,885,903      | 248.0              |
| <i>Amphilophium dusenianum</i> (Kraenzl.) L. G. Lohmann       | 9,027,451       | 60.7               |
| <i>Amphilophium ecuadorensense</i> A. H. Gentry               | 15,363,284      | 103.3              |
| <i>Amphilophium gnaphalanthum</i> (A. Rich.) L. G. Lohmann    | 16,579,322      | 111.5              |
| <i>Amphilophium lactiflorum</i> (Vahl) L. G. Lohmann          | 12,733,177      | 85.6               |
| <i>Amphilophium paniculatum</i> (L.) Kunth                    | 11,765,398      | 79.1               |
| <i>Amphilophium pilosum</i> Standl.                           | 13,946,760      | 93.8               |
| <i>Amphilophium steyermarkii</i> (A. H. Gentry) L. G. Lohmann | 10,369,861      | 69.8               |
| <b>Outgroup</b>                                               |                 |                    |
| <i>Anemopaegma prostratum</i> DC.                             | 15,876,937      | 106.8              |

**Supplementary Table 2.** Summary of the 78 protein-coding genes extracted from the plastomes, alignment length (bp), number of variable sites, and percentage of variable sites for the *Amphilophium* species aligned with *Anemopaegma prostratum* and for *Amphilophium* species only. Number of codon sites under positive selection detected using CODEML application in PAML with  $\omega > 1$  and  $\text{Pr} > 0.95$ .

| Gene | Alignment length (bp) with <i>Ane. prostratum</i> | Number of codons | Variable sites with <i>Ane. prostratum</i> | % variable with <i>Ane. prostratum</i> | Positive selected sites P>95% (codeml-model 2-BEB) | Variable sites <i>Amphilophium</i> only | % variable <i>Amphilophium</i> only |
|------|---------------------------------------------------|------------------|--------------------------------------------|----------------------------------------|----------------------------------------------------|-----------------------------------------|-------------------------------------|
| accD | 2676                                              | 892              | 227                                        | 8.48                                   | 12                                                 | 198                                     | 7.40                                |
| atpA | 1518                                              | 506              | 42                                         | 2.77                                   | 1                                                  | 35                                      | 2.31                                |
| atpB | 1497                                              | 499              | 28                                         | 1.87                                   | 0                                                  | 27                                      | 1.80                                |
| atpE | 402                                               | 134              | 9                                          | 2.24                                   | 0                                                  | 9                                       | 2.24                                |
| atpF | 555                                               | 185              | 20                                         | 3.60                                   | 0                                                  | 19                                      | 3.42                                |
| atpH | 246                                               | 82               | 4                                          | 1.63                                   | 0                                                  | 4                                       | 1.63                                |
| atpI | 744                                               | 248              | 19                                         | 2.55                                   | 0                                                  | 16                                      | 2.15                                |
| ccsA | 972                                               | 324              | 48                                         | 4.94                                   | 0                                                  | 42                                      | 4.32                                |
| cemA | 687                                               | 229              | 20                                         | 2.91                                   | 0                                                  | 18                                      | 2.62                                |
| clpP | 597                                               | 199              | 91                                         | 15.24                                  | 5                                                  | 78                                      | 13.07                               |
| infA | 282                                               | 94               | 24                                         | 8.51                                   | 2                                                  | 14                                      | 4.96                                |
| matK | 1536                                              | 512              | 87                                         | 5.66                                   | 0                                                  | 80                                      | 5.21                                |
| ndhA | 1092                                              | 364              | 44                                         | 4.03                                   | 0                                                  | 39                                      | 3.57                                |
| ndhB | 1533                                              | 511              | 9                                          | 0.59                                   | 0                                                  | 7                                       | 0.46                                |
| ndhC | 363                                               | 121              | 5                                          | 1.38                                   | 0                                                  | 5                                       | 1.38                                |
| ndhD | 1503                                              | 501              | 72                                         | 4.79                                   | 0                                                  | 61                                      | 4.06                                |
| ndhE | 306                                               | 102              | 4                                          | 1.31                                   | 0                                                  | 4                                       | 1.31                                |
| ndhF | 2232                                              | 744              | 133                                        | 5.96                                   | 0                                                  | 114                                     | 5.11                                |
| ndhG | 531                                               | 177              | 24                                         | 4.52                                   | 0                                                  | 21                                      | 3.95                                |
| ndhH | 1182                                              | 394              | 63                                         | 5.33                                   | 0                                                  | 56                                      | 4.74                                |
| ndhI | 507                                               | 169              | 18                                         | 3.55                                   | 0                                                  | 16                                      | 3.16                                |
| ndhJ | 477                                               | 159              | 13                                         | 2.73                                   | 0                                                  | 13                                      | 2.73                                |
| ndhK | 678                                               | 226              | 12                                         | 1.77                                   | 0                                                  | 8                                       | 1.18                                |
| petA | 969                                               | 323              | 32                                         | 3.30                                   | 0                                                  | 29                                      | 2.99                                |
| petB | 648                                               | 216              | 12                                         | 1.85                                   | 0                                                  | 10                                      | 1.54                                |
| petD | 483                                               | 161              | 12                                         | 2.48                                   | 0                                                  | 10                                      | 2.07                                |
| petG | 114                                               | 38               | 2                                          | 1.75                                   | 0                                                  | 2                                       | 1.75                                |
| petL | 96                                                | 32               | 4                                          | 4.17                                   | 0                                                  | 3                                       | 3.13                                |
| petN | 90                                                | 30               | 4                                          | 4.44                                   | 0                                                  | 3                                       | 3.33                                |
| psaA | 2253                                              | 751              | 38                                         | 1.69                                   | 0                                                  | 32                                      | 1.42                                |
| psaB | 2205                                              | 735              | 45                                         | 2.04                                   | 0                                                  | 32                                      | 1.45                                |
| psaC | 246                                               | 82               | 9                                          | 3.66                                   | 0                                                  | 9                                       | 3.66                                |
| psaI | 111                                               | 37               | 3                                          | 2.70                                   | 0                                                  | 3                                       | 2.70                                |
| psaJ | 135                                               | 45               | 4                                          | 2.96                                   | 0                                                  | 4                                       | 2.96                                |
| psbA | 1056                                              | 352              | 24                                         | 2.27                                   | 0                                                  | 21                                      | 1.99                                |
| psbB | 1527                                              | 509              | 49                                         | 3.21                                   | 0                                                  | 38                                      | 2.49                                |
| psbC | 1422                                              | 474              | 26                                         | 1.83                                   | 0                                                  | 25                                      | 1.76                                |
| psbD | 1062                                              | 354              | 14                                         | 1.32                                   | 0                                                  | 12                                      | 1.13                                |
| psbE | 252                                               | 84               | 5                                          | 1.98                                   | 0                                                  | 5                                       | 1.98                                |
| psbF | 120                                               | 40               | 3                                          | 2.50                                   | 0                                                  | 3                                       | 2.50                                |
| psbH | 222                                               | 74               | 4                                          | 1.80                                   | 0                                                  | 4                                       | 1.80                                |
| psbI | 111                                               | 37               | 5                                          | 4.50                                   | 0                                                  | 5                                       | 4.50                                |
| psbJ | 123                                               | 41               | 2                                          | 1.63                                   | 0                                                  | 2                                       | 1.63                                |
| psbK | 180                                               | 60               | 4                                          | 2.22                                   | 0                                                  | 3                                       | 1.67                                |
| psbL | 117                                               | 39               | 1                                          | 0.85                                   | 0                                                  | 1                                       | 0.85                                |
| psbM | 105                                               | 35               | 3                                          | 2.86                                   | 0                                                  | 3                                       | 2.86                                |
| psbN | 132                                               | 44               | 3                                          | 2.27                                   | 0                                                  | 2                                       | 1.52                                |
| psbT | 102                                               | 34               | 2                                          | 1.96                                   | 0                                                  | 1                                       | 0.98                                |
| psbZ | 189                                               | 63               | 4                                          | 2.12                                   | 0                                                  | 2                                       | 1.06                                |

(cont.)

**Supplementary Table 2. Cont.**

| Gene  | Alignment length (bp) with <i>Ane. prostratum</i> | Number of codons | Variable sites with <i>Ane. prostratum</i> | % variable with <i>Ane. prostratum</i> | Positive selected sites P>95% (codeml-model 2-BEB) | Variable sites <i>Amphilophium</i> only | % variable <i>Amphilophium</i> only |
|-------|---------------------------------------------------|------------------|--------------------------------------------|----------------------------------------|----------------------------------------------------|-----------------------------------------|-------------------------------------|
| rbcL  | 1434                                              | 478              | 38                                         | 2.65                                   | 5                                                  | 31                                      | 2.16                                |
| rpl14 | 369                                               | 123              | 6                                          | 1.63                                   | 0                                                  | 6                                       | 1.63                                |
| rpl16 | 408                                               | 136              | 10                                         | 2.45                                   | 0                                                  | 7                                       | 1.72                                |
| rpl2  | 825                                               | 275              | 7                                          | 0.85                                   | 0                                                  | 7                                       | 0.85                                |
| rpl20 | 432                                               | 144              | 26                                         | 6.02                                   | 0                                                  | 23                                      | 5.32                                |
| rpl22 | 474                                               | 158              | 16                                         | 3.38                                   | 0                                                  | 13                                      | 2.74                                |
| rpl23 | 306                                               | 102              | 8                                          | 2.61                                   | 0                                                  | 1                                       | 0.33                                |
| rpl32 | 177                                               | 59               | 11                                         | 6.21                                   | 0                                                  | 10                                      | 5.65                                |
| rpl33 | 201                                               | 67               | 6                                          | 2.99                                   | 0                                                  | 6                                       | 2.99                                |
| rpl36 | 114                                               | 38               | 14                                         | 12.28                                  | 0                                                  | 10                                      | 8.77                                |
| rpoA  | 1116                                              | 372              | 405                                        | 36.29                                  | 15                                                 | 281                                     | 25.18                               |
| rpoB  | 3228                                              | 1076             | 162                                        | 5.02                                   | 0                                                  | 112                                     | 3.47                                |
| rpoC1 | 2046                                              | 682              | 94                                         | 4.59                                   | 4                                                  | 70                                      | 3.42                                |
| rpoC2 | 4023                                              | 1341             | 234                                        | 5.82                                   | 2                                                  | 159                                     | 3.95                                |
| rps11 | 489                                               | 163              | 65                                         | 13.29                                  | 0                                                  | 55                                      | 11.25                               |
| rps12 | 378                                               | 126              | 5                                          | 1.32                                   | 0                                                  | 5                                       | 1.32                                |
| rps14 | 303                                               | 101              | 7                                          | 2.31                                   | 0                                                  | 6                                       | 1.98                                |
| rps15 | 222                                               | 74               | 2                                          | 0.90                                   | 0                                                  | 2                                       | 0.90                                |
| rps16 | 240                                               | 80               | 19                                         | 7.92                                   | 1                                                  | 11                                      | 4.58                                |
| rps18 | 456                                               | 152              | 57                                         | 12.50                                  | 11                                                 | 47                                      | 10.31                               |
| rps19 | 279                                               | 93               | 3                                          | 1.08                                   | 0                                                  | 3                                       | 1.08                                |
| rps2  | 714                                               | 238              | 60                                         | 8.40                                   | 4                                                  | 56                                      | 7.84                                |
| rps3  | 663                                               | 221              | 30                                         | 4.52                                   | 0                                                  | 28                                      | 4.22                                |
| rps4  | 642                                               | 214              | 41                                         | 6.39                                   | 0                                                  | 39                                      | 6.07                                |
| rps7  | 462                                               | 154              | 13                                         | 2.81                                   | 11                                                 | 12                                      | 2.60                                |
| rps8  | 405                                               | 135              | 19                                         | 4.69                                   | 1                                                  | 13                                      | 3.21                                |
| ycf1  | 6279                                              | 2093             | 488                                        | 7.77                                   | 31                                                 | 346                                     | 5.51                                |
| ycf2  | 6579                                              | 2193             | 321                                        | 4.88                                   | 25                                                 | 270                                     | 4.10                                |
| ycf3  | 507                                               | 169              | 6                                          | 1.18                                   | 0                                                  | 5                                       | 0.99                                |
| ycf4  | 597                                               | 199              | 55                                         | 9.21                                   | 8                                                  | 33                                      | 5.53                                |
| Total | 70554                                             | 23518            | 3658                                       |                                        | 138                                                | 2868                                    |                                     |



**Supplementary Table 3.** Results from the distribution of SSRs in all plastomes of the *Amphilophium* species studied here and *Anemopaegma prostratum*.

| Species                  | SSRs total | Unit size |    |     |       |       |      | Total per region |    |     | SSRs% per region |      |     | A/T repeats | % of A/T repeats | A repeats | T repeats | Total per region |        |     | SSR% per region |        |      |
|--------------------------|------------|-----------|----|-----|-------|-------|------|------------------|----|-----|------------------|------|-----|-------------|------------------|-----------|-----------|------------------|--------|-----|-----------------|--------|------|
|                          |            | mono      | di | tri | tetra | penta | hexa | LSC              | IR | SSC | LSC              | IR   | SSC |             |                  |           |           | exon             | intron | IGS | exon            | intron | IGS  |
| <i>A. carolinae</i>      | 52         | 31        | 4  | 4   | 6     | 5     | 2    | 37               | 11 | 4   | 71.2             | 21.2 | 7.7 | 29          | 55.8             | 12        | 17        | 9                | 8      | 35  | 17.3            | 15.4   | 67.3 |
| <i>A. chocoensis</i>     | 47         | 30        | 3  | 7   | 5     | 1     | 1    | 39               | 4  | 4   | 83.0             | 8.5  | 8.5 | 30          | 63.8             | 20        | 10        | 11               | 8      | 28  | 23.4            | 17.0   | 59.6 |
| <i>A. cuneifolium</i>    | 50         | 33        | 3  | 7   | 5     | 2     | 0    | 42               | 4  | 4   | 84.0             | 8.0  | 8.0 | 33          | 66.0             | 21        | 12        | 10               | 8      | 32  | 20.0            | 16.0   | 64.0 |
| <i>A. dolichoides</i>    | 50         | 29        | 4  | 5   | 6     | 4     | 2    | 36               | 11 | 3   | 72.0             | 22.0 | 6.0 | 27          | 54.0             | 11        | 16        | 9                | 6      | 41  | 18.0            | 12.0   | 82.0 |
| <i>A. dusenianum</i>     | 57         | 39        | 3  | 7   | 7     | 1     | 0    | 45               | 7  | 5   | 78.9             | 12.3 | 8.8 | 37          | 64.9             | 16        | 21        | 13               | 10     | 34  | 22.8            | 17.5   | 59.6 |
| <i>A. ecuadorese</i>     | 49         | 32        | 3  | 7   | 4     | 2     | 1    | 40               | 8  | 1   | 81.6             | 16.3 | 2.0 | 30          | 61.2             | 13        | 17        | 9                | 10     | 30  | 18.4            | 20.4   | 61.2 |
| <i>A. gnatophalantum</i> | 55         | 38        | 2  | 6   | 9     | 0     | 0    | 46               | 6  | 3   | 83.6             | 10.9 | 5.5 | 38          | 69.1             | 22        | 16        | 13               | 9      | 33  | 23.6            | 16.4   | 60.0 |
| <i>A. lactiflorum</i>    | 54         | 36        | 2  | 6   | 9     | 1     | 0    | 44               | 6  | 4   | 81.5             | 11.1 | 7.4 | 34          | 63.0             | 20        | 14        | 13               | 10     | 31  | 24.1            | 18.5   | 57.4 |
| <i>A. paniculatum</i>    | 44         | 30        | 3  | 6   | 4     | 1     | 0    | 38               | 5  | 1   | 86.4             | 11.4 | 2.3 | 29          | 65.9             | 14        | 15        | 7                | 8      | 29  | 15.9            | 18.2   | 65.9 |
| <i>A. pilosum</i>        | 48         | 33        | 3  | 6   | 4     | 1     | 1    | 40               | 5  | 3   | 83.3             | 10.4 | 6.3 | 32          | 66.7             | 16        | 16        | 7                | 10     | 31  | 14.6            | 20.8   | 64.6 |
| <i>A. steyermarkii</i>   | 46         | 34        | 2  | 3   | 6     | 1     | 0    | 37               | 5  | 4   | 80.4             | 10.9 | 8.7 | 32          | 69.6             | 14        | 18        | 11               | 8      | 27  | 23.9            | 17.4   | 58.7 |
| <i>Ane. prostratum</i>   | 42         | 27        | 3  | 6   | 3     | 1     | 2    | 29               | 10 | 3   | 69.0             | 23.8 | 7.1 | 26          | 61.9             | 13        | 13        | 10               | 4      | 28  | 23.8            | 9.5    | 66.7 |

**Supplementary Table 4.** Results from the REPuter analysis of distribution of repeat sequences in the plastomes of the *Amphilophium* species studied here and *Anemopaegma prostratum*. F = forward, P = palindrome, and R reverse repeats.

| Species                  | Total | Total repeats per region |    |     | Repeat type |   |   | Maximum size | Number of repeats per size |         |         |         |         |       | Number of repeats per region |     |        |
|--------------------------|-------|--------------------------|----|-----|-------------|---|---|--------------|----------------------------|---------|---------|---------|---------|-------|------------------------------|-----|--------|
|                          |       | LSC                      | IR | SSC | F           | P | R |              | 30-39bp                    | 40-49bp | 50-59bp | 60-69bp | 70-79bp | >80bp | exon                         | IGS | intron |
| <i>A. carolinae</i>      | 50    | 23                       | 27 | 0   | 49          | 1 | 0 | 141          | 3                          | 21      | 5       | 11      | 4       | 6     | 29                           | 20  | 1      |
| <i>A. chocoensis</i>     | 49    | 33                       | 16 | 0   | 42          | 6 | 1 | 84           | 23                         | 17      | 2       | 5       | 1       | 1     | 23                           | 18  | 8      |
| <i>A. cuneifolium</i>    | 50    | 17                       | 33 | 0   | 47          | 3 | 0 | 91           | 15                         | 15      | 7       | 7       | 1       | 5     | 20                           | 27  | 3      |
| <i>A. dolichoides</i>    | 50    | 8                        | 42 | 0   | 49          | 1 | 0 | 150          | 1                          | 18      | 13      | 6       | 4       | 8     | 24                           | 26  | 0      |
| <i>A. dusenianum</i>     | 56    | 17                       | 39 | 0   | 49          | 4 | 3 | 115          | 29                         | 15      | 4       | 4       | 1       | 3     | 33                           | 18  | 5      |
| <i>A. ecuadorese</i>     | 53    | 11                       | 42 | 0   | 50          | 3 | 0 | 95           | 27                         | 14      | 6       | 3       | 1       | 2     | 19                           | 32  | 2      |
| <i>A. gnatophalantum</i> | 42    | 20                       | 22 | 0   | 37          | 5 | 0 | 82           | 25                         | 10      | 3       | 2       | 1       | 1     | 20                           | 18  | 4      |
| <i>A. lactiflorum</i>    | 38    | 18                       | 20 | 0   | 33          | 5 | 0 | 88           | 25                         | 8       | 1       | 1       | 2       | 1     | 18                           | 14  | 6      |
| <i>A. paniculatum</i>    | 50    | 7                        | 43 | 0   | 48          | 2 | 0 | 50           | 20                         | 18      | 5       | 3       | 4       | 0     | 12                           | 36  | 2      |
| <i>A. pilosum</i>        | 50    | 15                       | 35 | 0   | 47          | 3 | 0 | 109          | 24                         | 13      | 3       | 4       | 2       | 4     | 20                           | 30  | 0      |
| <i>A. steyermarkii</i>   | 50    | 13                       | 37 | 0   | 48          | 2 | 0 | 150          | 8                          | 18      | 5       | 9       | 1       | 9     | 31                           | 18  | 1      |
| <i>Ane. prostratum</i>   | 50    | 3                        | 47 | 0   | 49          | 1 | 0 | 165          | 0                          | 13      | 9       | 14      | 7       | 7     | 24                           | 26  | 0      |

**Supplementary Table 5.** Results from the REPuter analysis of distribution of repeat sequences in the plastomes of the *Amphilophium* species studied here and *Anemopaegma prostratum*.

| Species/<br>Location<br>of repeat 1 | <i>A.<br/>panicu<br/>latum</i> | <i>A.<br/>pilosu<br/>m</i> | <i>A.<br/>ecuadore<br/>nse</i> | <i>A.<br/>dusenian<br/>um</i> | <i>A.<br/>gnatophalan<br/>tum</i> | <i>A.<br/>lactiflor<br/>um</i> | <i>A.<br/>steyerm<br/>akii</i> | <i>A.<br/>dolicho<br/>ides</i> | <i>A.<br/>carolin<br/>ae</i> | <i>A.<br/>chocoe<br/>nsis</i> | <i>A.<br/>cuneifoli<br/>um</i> | <i>Ane.<br/>prostrat<br/>um</i> |
|-------------------------------------|--------------------------------|----------------------------|--------------------------------|-------------------------------|-----------------------------------|--------------------------------|--------------------------------|--------------------------------|------------------------------|-------------------------------|--------------------------------|---------------------------------|
| <i>accD</i>                         | 2                              | 2                          | 3                              | 4                             | 2                                 | 5                              | 9                              | 6                              | 10                           | 7                             | 3                              |                                 |
| <i>rbcL/accD</i>                    | 1                              | 4                          | 1                              | 1                             | 1                                 | 1                              | 1                              | 1                              | 1                            | 2                             | 1                              |                                 |
| <i>ycf1</i>                         | 1                              | 2                          | 3                              | 12                            | 4                                 | 4                              | 13                             | 11                             | 12                           | 6                             | 11                             | 14                              |
| <i>ycf2</i>                         | 7                              | 11                         | 9                              | 8                             | 7                                 | 6                              | 6                              | 7                              | 7                            | 5                             | 3                              | 8                               |
| <i>rps12/trnV<br/>-GAC</i>          | 1                              | 1                          | 1                              | 1                             | 1                                 | 1                              | 1                              | 1                              | 1                            | 1                             | 1                              |                                 |
| <i>trnN-<br/>GUU/ycf1</i>           | 27                             | 12                         | 8                              | 1                             | 1                                 | 1                              | 1                              | 1                              | 3                            |                               | 1                              |                                 |
| <i>ycf3</i>                         | 2                              | 2                          | 2                              | 3                             | 4                                 | 4                              | 1                              |                                | 1                            | 3                             | 2                              |                                 |
| <i>psbT/psbN</i>                    | 1                              | 1                          | 1                              | 1                             | 1                                 | 1                              | 1                              |                                |                              | 1                             | 1                              | 1                               |
| <i>rps11</i>                        | 1                              | 1                          | 2                              | 5                             | 3                                 | 1                              | 1                              |                                |                              | 1                             | 1                              | 1                               |
| <i>rpl23/trnI-<br/>CAU</i>          | 6                              | 7                          | 19                             |                               | 8                                 | 4                              | 8                              |                                |                              | 3                             | 17                             |                                 |
| <i>rps18</i>                        | 1                              | 1                          | 1                              | 3                             | 2                                 |                                | 1                              |                                |                              | 1                             | 1                              | 1                               |
| <i>psbI/trnS-<br/>GCU</i>           |                                | 1                          | 1                              | 2                             | 2                                 | 2                              |                                |                                |                              | 2                             | 1                              |                                 |
| <i>psaB</i>                         |                                | 1                          | 1                              | 1                             | 1                                 | 1                              |                                |                                |                              | 1                             |                                |                                 |
| <i>atpF/atpH</i>                    |                                |                            |                                |                               | 1                                 | 1                              |                                |                                |                              | 1                             |                                |                                 |
| <i>psbC/trnS-<br/>UGA</i>           |                                |                            |                                |                               | 1                                 | 1                              |                                |                                |                              | 1                             |                                |                                 |
| <i>rps11/rpl3<br/>6</i>             |                                |                            |                                |                               |                                   |                                | 4                              | 10                             | 5                            |                               |                                |                                 |
| <i>rrn4.5/rrn<br/>5</i>             |                                |                            |                                |                               | 1                                 | 1                              |                                |                                |                              | 1                             |                                |                                 |
| <i>trnI-<br/>CAU/ycf2</i>           |                                |                            |                                |                               |                                   |                                | 1                              | 11                             | 4                            |                               |                                |                                 |
| <i>clpP</i>                         |                                |                            |                                |                               |                                   |                                |                                |                                |                              | 5                             | 1                              |                                 |
| <i>clpP/psbB</i>                    |                                |                            |                                |                               |                                   |                                |                                |                                |                              | 1                             | 1                              |                                 |
| <i>petN/psbM</i>                    |                                |                            |                                |                               |                                   |                                |                                |                                |                              | 1                             |                                |                                 |
| <i>psaA/ycf3</i>                    |                                |                            |                                | 1                             |                                   |                                |                                |                                |                              |                               |                                |                                 |
| <i>psaJ/rpl33</i>                   |                                |                            | 1                              |                               |                                   |                                |                                |                                |                              | 2                             | 1                              |                                 |
| <i>rpl2</i>                         |                                |                            |                                | 11                            |                                   | 2                              |                                |                                |                              |                               |                                |                                 |
| <i>rpl33/rps1<br/>8</i>             |                                |                            |                                |                               |                                   |                                |                                | 1                              | 5                            |                               |                                |                                 |
| <i>rpl36/infA</i>                   |                                |                            |                                |                               |                                   |                                |                                | 1                              | 1                            |                               |                                |                                 |
| <i>rpoA</i>                         |                                |                            |                                |                               |                                   |                                |                                |                                |                              | 2                             | 1                              |                                 |
| <i>rpoA/rps11</i>                   |                                |                            |                                |                               |                                   |                                | 1                              |                                |                              | 1                             | 2                              |                                 |
| <i>trnL-<br/>UAA/trnF-<br/>GAA</i>  |                                |                            |                                |                               |                                   |                                |                                |                                |                              | 1                             | 1                              |                                 |
| <i>atpB/rbcL</i>                    |                                |                            |                                |                               | 1                                 |                                |                                |                                |                              |                               |                                |                                 |
| <i>psaI/ycf4</i>                    |                                | 4                          |                                |                               |                                   |                                |                                |                                |                              |                               |                                | 1                               |
| <i>psbM/trnD<br/>-GUC</i>           |                                |                            |                                |                               |                                   | 1                              |                                |                                |                              |                               |                                |                                 |
| <i>rpl22</i>                        |                                |                            |                                |                               |                                   |                                | 1                              |                                |                              |                               |                                |                                 |
| <i>rpoC1</i>                        |                                |                            |                                | 2                             |                                   |                                |                                |                                |                              |                               |                                |                                 |
| <i>rps15</i>                        |                                |                            |                                |                               |                                   | 1                              |                                |                                |                              |                               |                                |                                 |
| <i>ycf4</i>                         |                                |                            |                                |                               | 1                                 |                                |                                |                                |                              |                               |                                |                                 |
| <i>rpl2/rpl23</i>                   |                                |                            |                                |                               |                                   |                                |                                |                                |                              |                               |                                | 2                               |
| <i>rps12</i>                        |                                |                            |                                |                               |                                   |                                |                                |                                |                              |                               |                                | 1                               |
| <i>trnI-<br/>AAU/ndhB</i>           |                                |                            |                                |                               |                                   |                                |                                |                                |                              |                               |                                | 21                              |
| <b>Total</b>                        | <b>50</b>                      | <b>50</b>                  | <b>53</b>                      | <b>56</b>                     | <b>42</b>                         | <b>38</b>                      | <b>50</b>                      | <b>50</b>                      | <b>50</b>                    | <b>49</b>                     | <b>50</b>                      | <b>27</b>                       |

## SUPPLEMENTARY FIGURE

**Supplementary Figure 1.** Gene map of *A. gnatophalantum* and *A. steyermarkii*, the smallest and largest *Amphilophium* plastomes sequenced in this study. Genes drawn inside the circle are transcribed clockwise, and those outside are transcribed counterclockwise. Genes belonging to different functional groups are colored following the legend. The darker and lighter gray in the inner circle correspond to GC content and AT content, respectively.

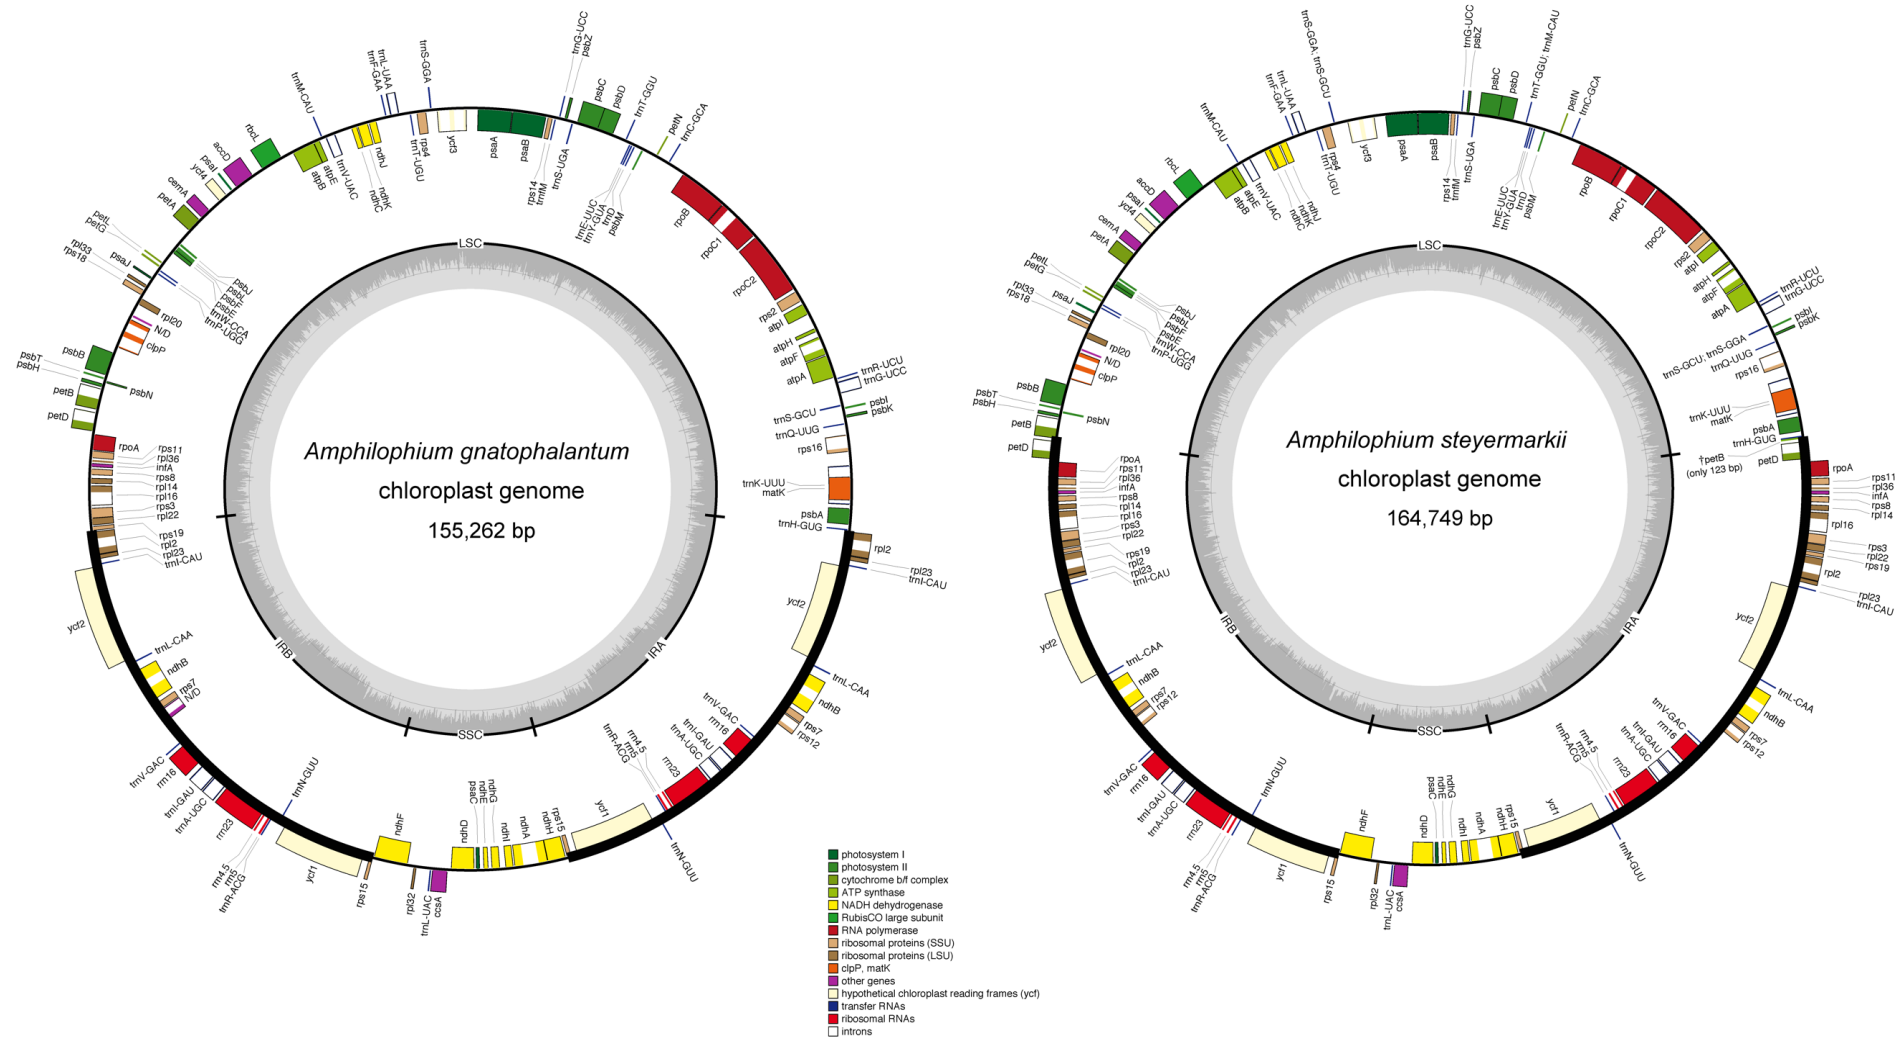

**Supplementary Figure 2.** Comparison of *Amphilophium* and *Anemopaegma prostratum* cp genomes. **A.** Large Single Copy (LSC), Inverted Repeat (IR), and Small Single Copy regions lengths in base pairs (bp). **B.** Coding and noncoding regions lengths in bp.

**A**

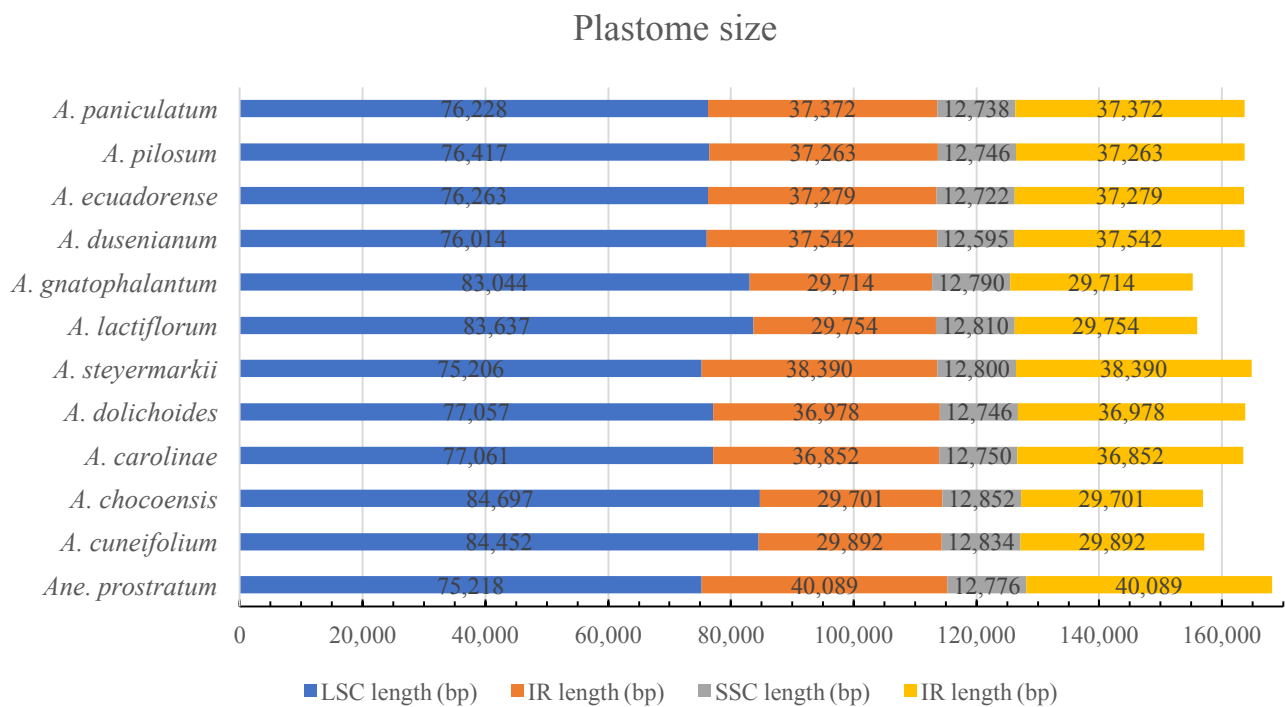

**B**

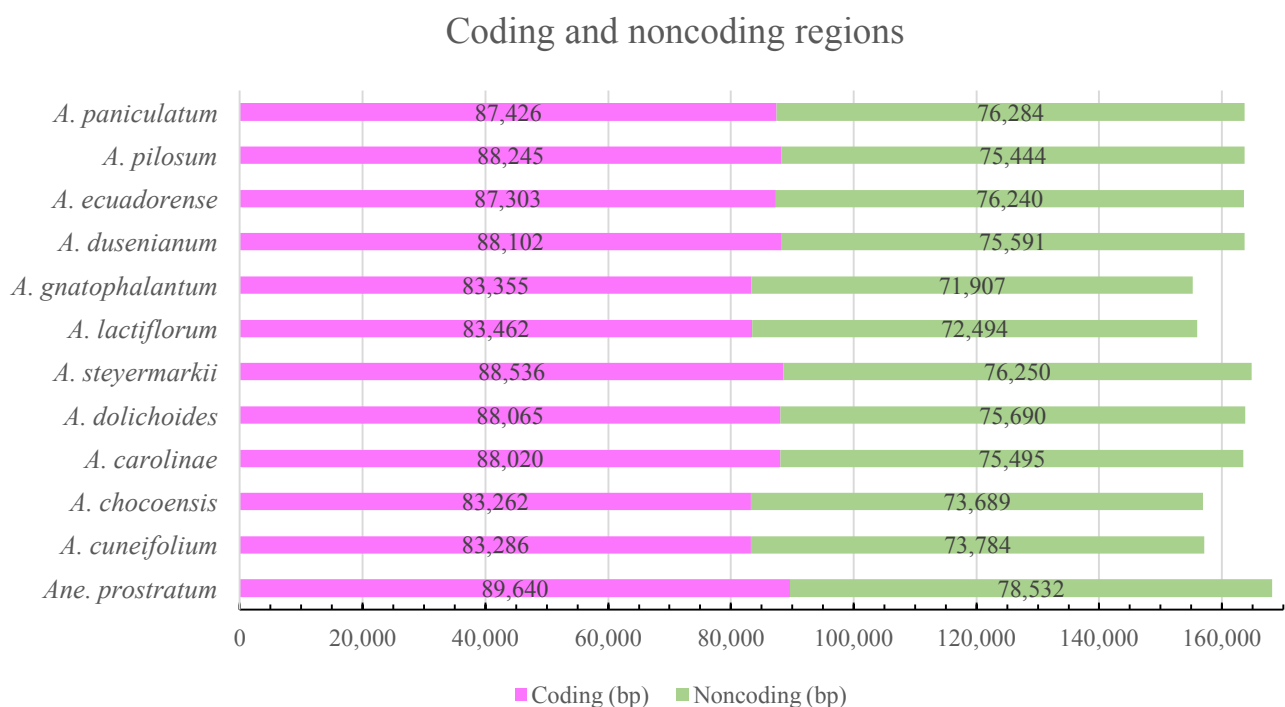

**Supplementary Figure 3.** Synteny and rearrangements detected in the plastomes from the 11 sequenced *Amphilophium* species, *Adenocalymma peregrinum*, *Anemopaegma arvense*, and *Tanaecium tetragonolobum* using the Mauve multiple-genome alignment program. Yellow blocks showing the *ycf2* region inversion in the cp genomes of the *Anemopaegma* species and the blue blocks showing the inversion within the *ycf1* gene in *Tanaecium tetragonolobum*.

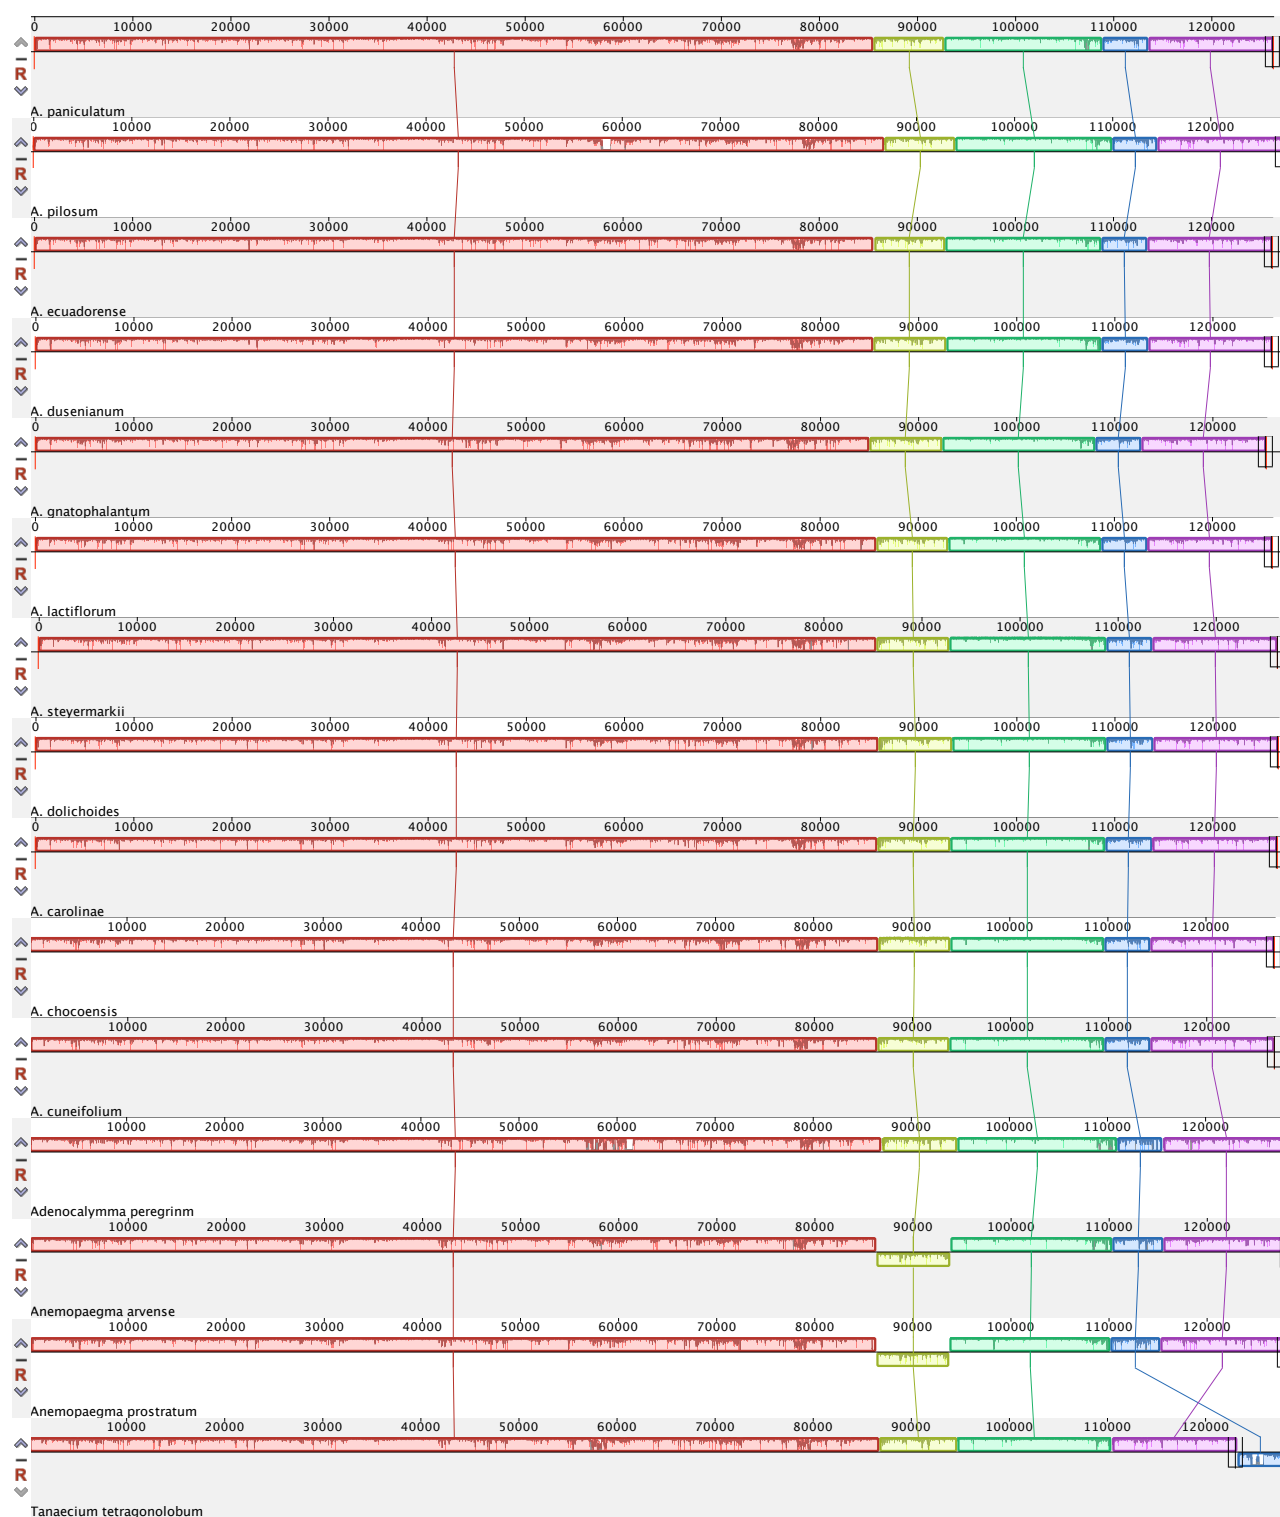

Supplement: Supplementary file [file 15543866]
